# Supplementary material
Source: PubMed Central journal article supplement (PMC1173155)
Supplement: 7600715s2.pdf [file 7600715s2.pdf]

Supplementary Figure 2

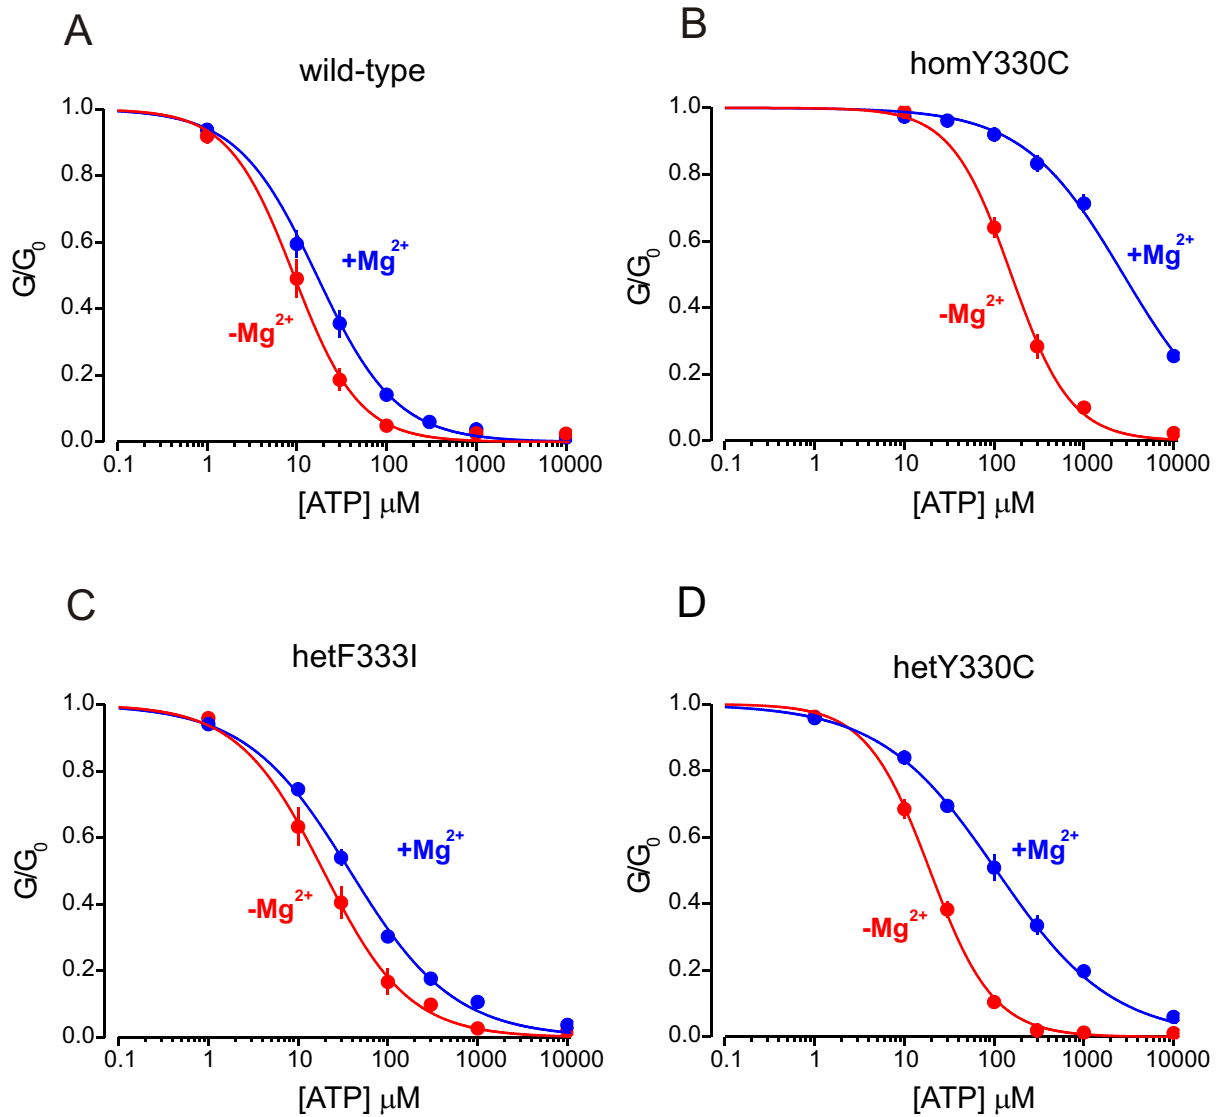

*Suppl. Figure 2*

Mean relationship between [ATP] and  $K_{ATP}$  conductance expressed relative to the conductance in the absence of the nucleotide ( $G_c$ ), measured in the presence (blue symbols) and in the absence (red symbols) of  $Mg^{2+}$ , for Kir6.2/SUR1 channels (**A**) homomeric Kir6.2-F333I/SUR1 (**B**) and heteromeric Kir6.2-F333I/SUR1 (**C**) and Kir6.2-Y330C/SUR1 (**D**) channels. The smooth curves are the best fit with the equation 4 with the values reported in Table 1A.
